# Supplementary material
Source: Springer Nature journal article supplement (https://www.springermedizin.de/resource/supplementary/13256_2008_1114_MOESM3_ESM.pdf/9647036)

**A**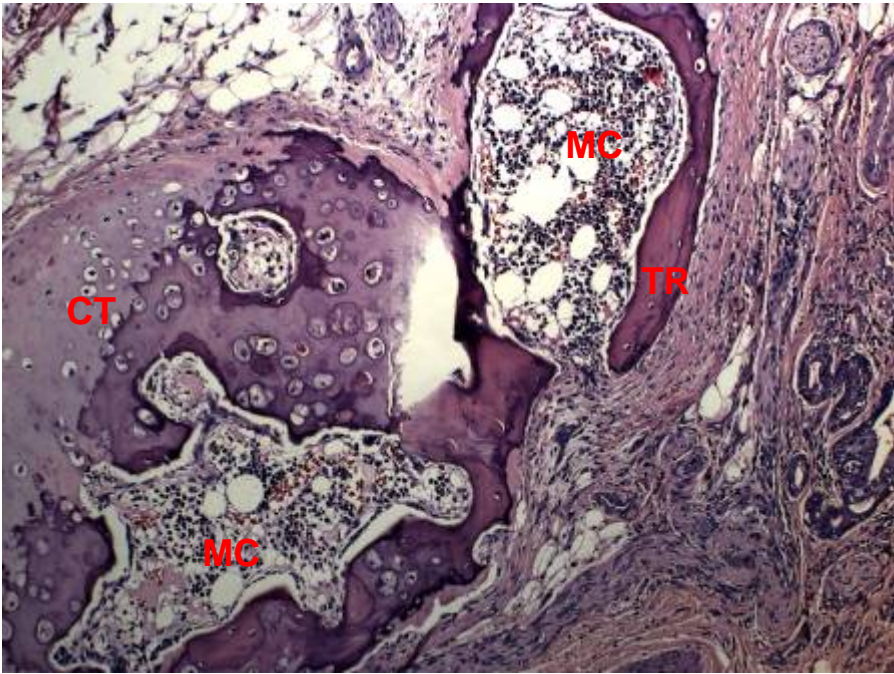**H&E 100X****B**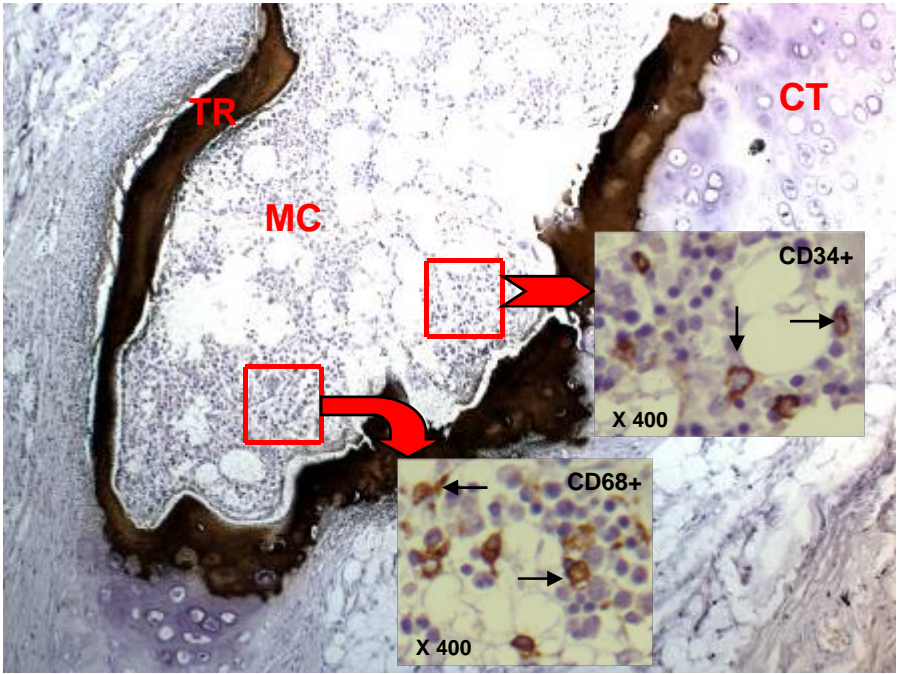**Von-Kossa 100 X**

Supplement: MOESM3 [file 9647036]
